# Supplementary material for: A reconfigurable and magnetically responsive assembly for dynamic solar steam generation
Source: PubMed Central journal article supplement (PMC9329472; doi:10.1038/s41467-022-32051-3), 2022-07-27
Supplement: 41467_2022_32051_MOESM3_ESM.pdf [file 41467_2022_32051_MOESM3_ESM.pdf]

## **Description of Additional Supplementary Files**

File Name: Supplementary Movie 1

Description: The comparison of disassembly processes between bare Fe<sub>3</sub>O<sub>4</sub> assembly and Fe<sub>3</sub>O<sub>4</sub>@G assembly.

File Name: Supplementary Movie 2

Description: Dynamic rotation of the CA assembly of Fe<sub>3</sub>O<sub>4</sub>@G.

File Name: Supplementary Movie 3

Description: Temperature distribution of the CA assembly during dynamic evaporation under 1 and 2 sun illumination.

File Name: Supplementary Movie 4

Description: The simulated nanoparticles' movement in CA assembly during dynamic evaporation.

File Name: Supplementary Movie 5

Description: Luminescence tracing of ions movement in CA assembly at static and dynamic state.
